# Supplementary material for: Antibody fragment immobilization on planar gold and gold nanoparticle modified quartz crystal microbalance with dissipation sensor surfaces for immunosensor applications
Source: Royal Society of Chemistry journal article supplement (doi:10.1039/c4ay00070f), 2014-01-01
Supplement: c4ay00070f1.pdf [file c4ay00070f1.pdf]

### Supplementary Material

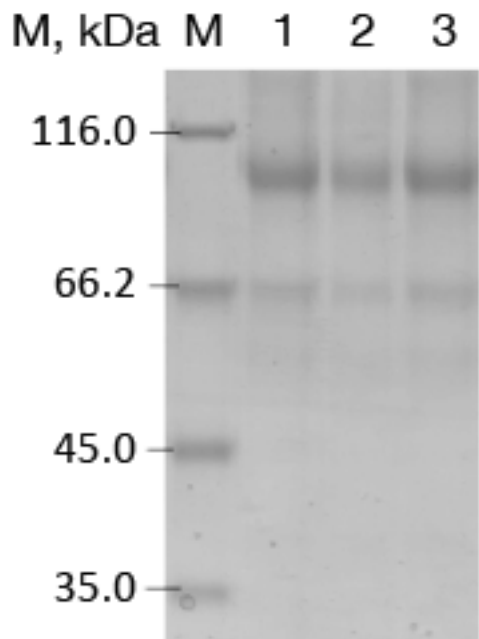

**Figure S1.** SDS-PAGE evaluation of the 2-ME reduction of antibodies against gp 51. M – molecular weight marker; 1-3 – antibody fragments.

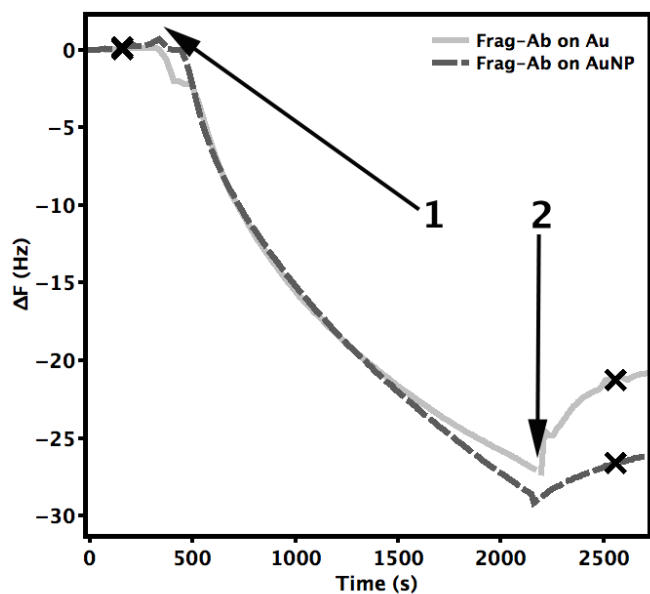

**Figure S2.** Frag-Ab/gp51 interaction on planar Au (grey line) and AuNP modified (black line) QCM-D sensor surfaces at 0.5 mg/mL gp51. 1 – start of association, 2 – start of dissociation. Symbols "X" mark the report points.
